# Supplementary material for: High performance thermoelectrics from low-cost and abundant CuS/CuI composites
Source: Royal Society of Chemistry journal article supplement (doi:10.1039/d3ta06474c), 2023-12-19
Supplement: d3ta06474c1.pdf [file d3ta06474c1.pdf]

## Supporting Information

### High performance thermoelectrics from low-cost and abundant CuS/CuI composites

Rafiq Mulla<sup>1,2,†\*</sup>, Aleksandar Živković<sup>3,†\*</sup>, Michael E. A. Warwick<sup>1</sup>, Nora H. de Leeuw<sup>2,4</sup>, Charles W. Dunnill<sup>1</sup>, Andrew R. Barron<sup>1,5,6,7\*</sup>

<sup>1</sup> Energy Safety Research Institute, Swansea University, Bay Campus, Fabian Way, Swansea, SA1 8EN, UK

<sup>2</sup> Dept. of Physics, B.M.S. College of Engineering, Bengaluru-560019, India

<sup>3</sup> Department of Earth Sciences, Utrecht University, Princetonlaan 8a,3548CB Utrecht, The Netherlands

<sup>4</sup> School of Chemistry, University of Leeds, Leeds LS2 9JT, United Kingdom

<sup>5</sup> Arizona Institutes for Resilience (AIR), University of Arizona, Tucson, AZ 85721, USA

<sup>6</sup> Department of Chemistry and Department of Materials Science and Nanoengineering, Rice University, Houston, TX 77005, USA

<sup>7</sup> Faculty of Engineering, UniversitiTeknologi Brunei, Brunei Darussalam

\*Corresponding Author: [rafiq.mulla.phy@bmsce.ac.in](mailto:rafiq.mulla.phy@bmsce.ac.in) (RM); [a.zivkovic@uu.nl](mailto:a.zivkovic@uu.nl) (AŽ)  
[c.dunnill@gmail.com](mailto:c.dunnill@gmail.com) (CWD); [a.r.barron@swansea.ac.uk](mailto:a.r.barron@swansea.ac.uk) (ARB)

† These authors contributed equally

### Additional information

Employed basis sets listed in CRYSTAL17 input format, taken from <https://www.crystal.unito.it/basis-sets.php> (accessed 14/07/2022).

| Copper                  | Sulphur                |
|-------------------------|------------------------|
| 86-4111(41D)G_doll_2000 | 86-311G*_lichanot_1993 |
| 29 8                    | 16 6                   |
| 0 0 8 2.0 1.0           | 0 0 8 2.0 1.0          |
| 398000.0 0.000227       | 109211.0 0.0002520     |
| 56670.0 0.001929        | 16235.206 0.0019934    |
| 12010.0 0.01114         | 3573.0286 0.0111177    |
| 3139.0 0.05013          | 943.23811 0.0498945    |
| 947.2 0.17031           | 287.26179 0.1661455    |
| 327.68 0.3693           | 99.914226 0.3627018    |
| 128.39 0.4030           | 38.602137 0.4108787    |
| 53.63 0.1437            | 15.531224 0.1457875    |
| 0 1 6 8.0 1.0           | 0 1 6 8.0 1.0          |
| 1022.0 -0.00487 0.00850 | 281.22171 -0.0057780   |
| 238.9 -0.0674 0.06063   | 0.0081427              |
| 80.00 -0.1242 0.2118    | 67.106575 -0.0665855   |
| 31.86 0.2466 0.3907     | 0.0565570              |
| 13.33 0.672 0.3964      | 21.794135 -0.1203552   |
| 4.442 0.289 0.261       | 0.2039582              |
| 0 1 4 8.0 1.0           | 8.2097646 0.2741310    |
| 54.7 0.0119 -0.0288     | 0.3973328              |
| 23.26 -0.146 -0.0741    | 3.4178289 0.6463829    |
| 9.92 -0.750 0.182       | 0.3946313              |
| 4.013 1.031 1.280       | 1.5452225 0.2925792    |
| 0 1 1 1.0 1.0           | 0.1544345              |
| 1.582 1.0 1.0           | 0 1 3 6.0 1.0          |
| 0 1 1 0.0 1.0           | 4.3752432 -0.1750000 - |

|                |                      |
|----------------|----------------------|
| 0.596 1.0 1.0  | 0.0613439            |
| 0 1 1 0.0 1.0  | 1.8096201 -0.5938952 |
| 0.150 1.0 1.0  | 0.1272251            |
| 0 3 4 10.0 1.0 | 0.6833985 0.8298996  |
| 48.54 0.031    | 1.2215893            |
| 13.55 0.162    | 0 1 1 0.0 1.0        |
| 4.52 0.378     | 0.2413 1.0 1.0       |
| 1.47 0.459     | 0 1 1 0.0 1.0        |
| 0 3 1 0.0 1.0  | 0.106 1.0 1.0        |
| 0.392 1.0      | 0 3 1 0. 1.          |
|                | 0.383 1.0            |

| <b>Iodide</b><br>LC_doll_1998 | <b>Iodide</b><br>Mike Towler |
|-------------------------------|------------------------------|
| 253 5                         | 53 11                        |
| INPUT                         | 0 0 9 2.0 1.11463            |
| 7. 0 2 2 2 1 0                | 3796580.0 0.0000486          |
| 3.511200 83.113863 0          | 556463.0 0.000394            |
| 1.755600 5.201876 0           | 120030.0 0.00229             |
| 2.968800 82.811109 0          | 30877.7 0.011153             |
| 1.484400 3.379682 0           | 8938.77 0.046196             |
| 1.906600 10.304277 0          | 2853.41 0.153983             |
| 0.953300 7.588032 0           | 1013.04 0.3495               |
| 2.307500 -21.477936 0         | 403.42 0.4298                |
| 0 1 1 2.0 1.0 merged s and p  | 169.683 0.20006              |
| 2.130007 1.0 1.0              | 0 1 7 8.0 1.13163            |
| 0 1 1 0.0 1.0 merged s and p  | 10780.9 -0.000264            |
| 0.3245 1.0 1.0                | 0.0010711                    |
| 0 1 1 0.0 1.0 merged s and p  | 2502.22 -0.00608 0.00978     |
| 0.1115 1.0 1.0                | 769.087 -0.0513 0.0575       |
| 0 2 1 5. 1                    | 274.618 -0.147205 0.2194     |
| 2.432887 1.                   | 111.365 0.1122 0.4605        |
| 0 0 1 0. 1                    | 51.8482 0.5808 0.4568        |
| 1.770481 1.                   | 25.1274 0.471 0.215          |
|                               | 0 1 6 8.0 1.15719            |
|                               | 230.902 0.00648 -0.0135      |
|                               | 91.8899 -0.0261 -0.0666      |
|                               | 38.3274 -0.3172 0.0089       |
|                               | 17.3859 -0.0365 0.8289       |
|                               | 8.1559 0.90233 1.3049        |
|                               | 3.88355 0.4588 0.443         |
|                               | 0 3 6 10.0 1.0               |
|                               | 407.397 0.013328             |
|                               | 121.623 0.0935               |
|                               | 45.6127 0.3035               |
|                               | 18.9877 0.470024             |
|                               | 8.4634 0.3103                |
|                               | 3.6279 0.054                 |
|                               | 0 1 3 8.0 1.0                |
|                               | 9.05308 -2.3837 -0.0815      |
|                               | 4.9116 -0.5412 0.3104        |

---

2.3444 5.3892 0.719  
0 1 1 7.0 1.0  
1.179 1.0 1.0  
0 3 3 10.0 1.0  
6.7601 0.2229  
2.7113 0.5615  
1.1174 0.4214  
0 3 1 0.0 1.0  
0.4254 1.0  
0 1 1 0.0 1.0  
0.585 1.0 1.0  
0 1 1 0.0 1.0  
0.2194 1.0 1.0  
0 1 1 0.0 1.0  
0.0686 1.0 1.0

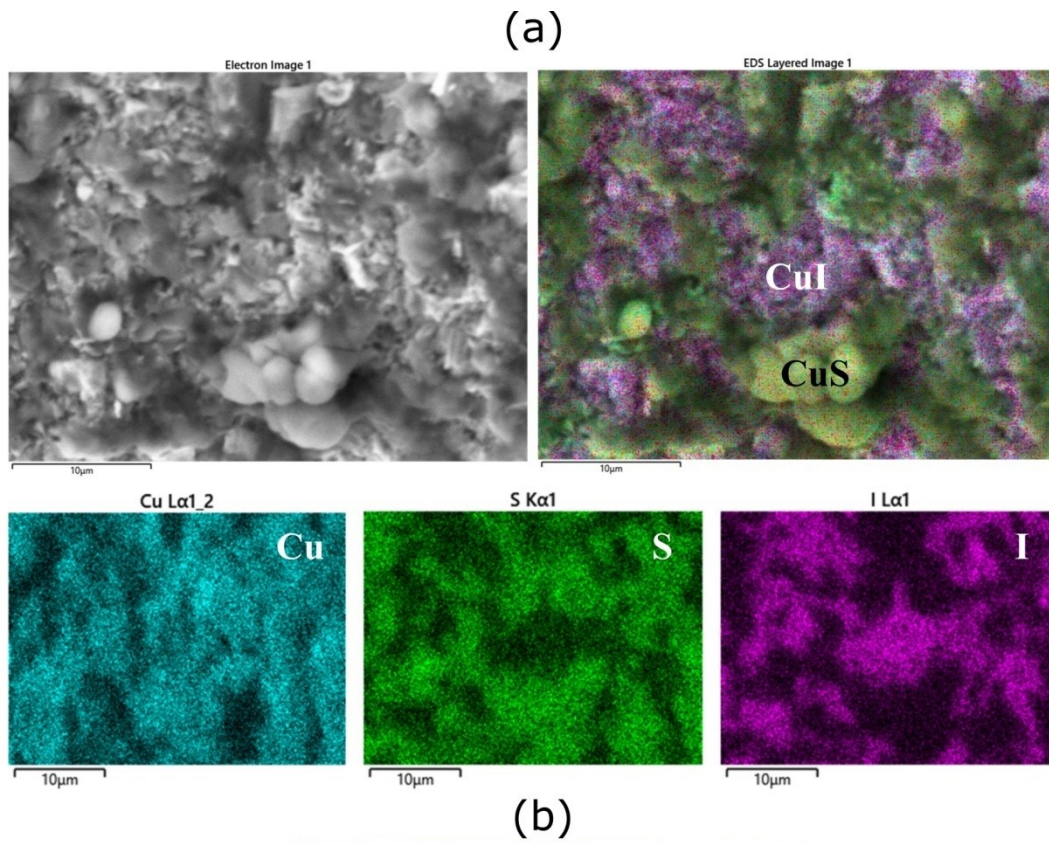

(b)

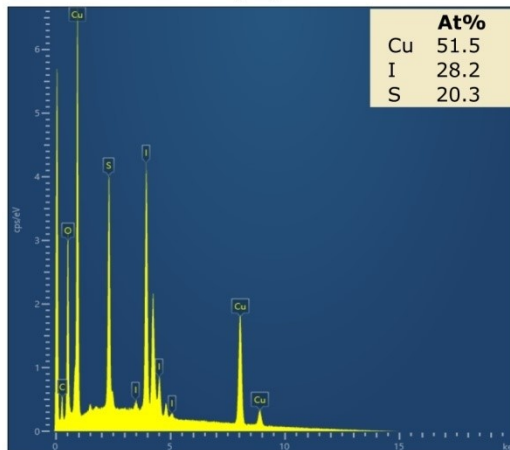

Figure S1. (a) SEM-EDX elemental mapping of a broken solid pellet of CuS:CuI (wt%)-1:4 sample. Images show coloured elemental mapping, (b) shows the composition of the same sample.

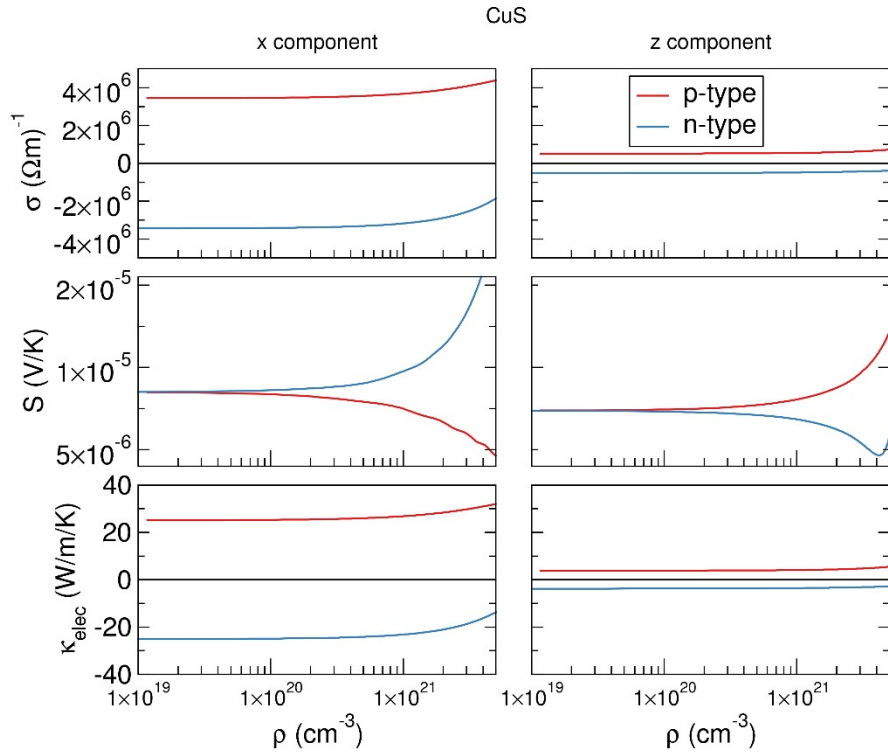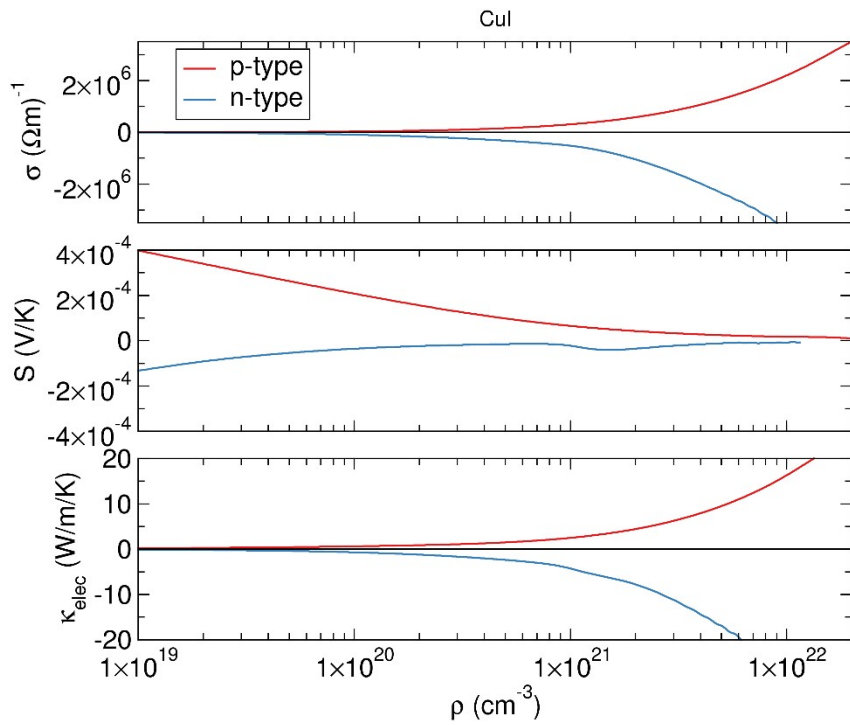

Figure S2. Calculated electrical conductivity ( $\sigma$ ), Seebeck coefficient ( $S$ ), and electronic part of the thermal conductivity ( $\kappa$ ) as function of charge carrier concentration of CuS (top) and CuI (bottom) using the HSE functional.

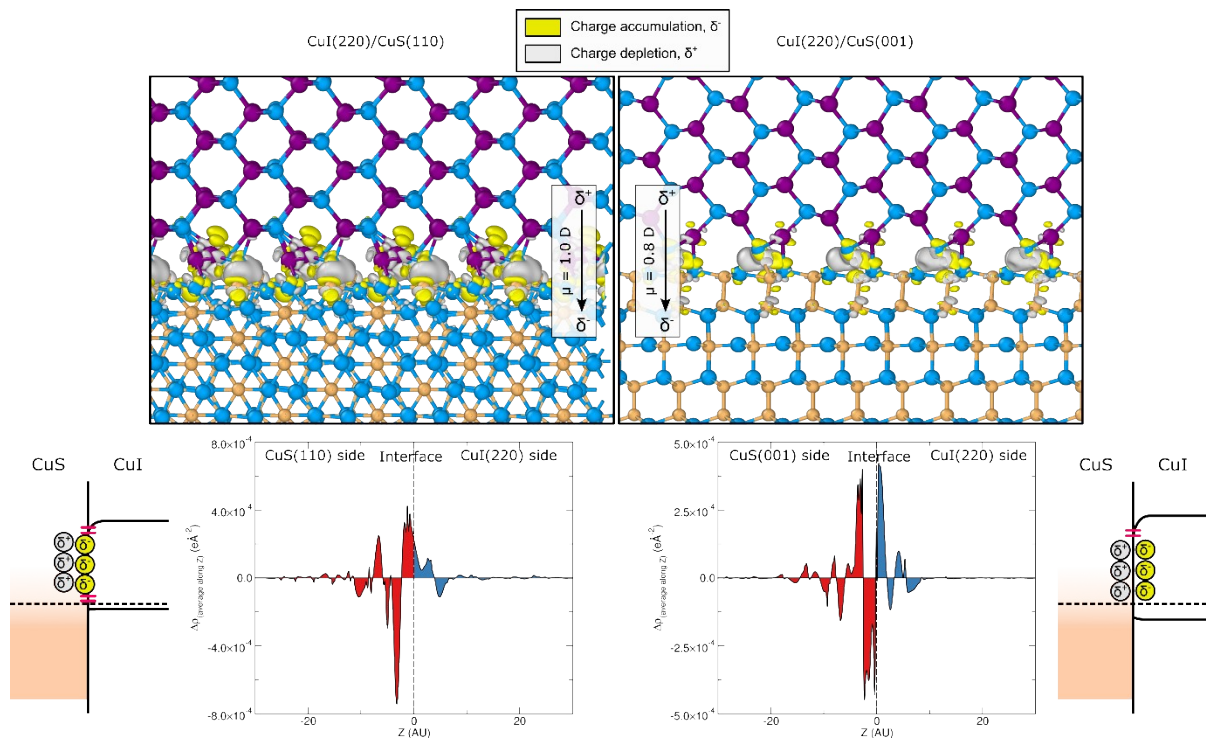

Figure S3. Calculated charge density difference (isosurface reported for a value of  $0.002 \text{ e}\text{\AA}^{-3}$ ) together with the band alignment derived from the LPDOS analysis outlined in the main text, supplemented with the band bending mechanism elaborated through the planar averaged charge density.
